# Supplementary material
Source: PubMed Central journal article supplement (PMC7817116)
Supplement: pnas.2020454118.sapp.pdf [file pnas.2020454118.sapp.pdf]

# PNAS

[www.pnas.org](http://www.pnas.org)

Supplementary Information for

A Genome-wide microRNA screen identifies the microRNA-183/96/182 cluster as a modulator of circadian rhythms

Lili Zhou<sup>1</sup>, Caitlyn Miller<sup>1</sup>, Loren J. Miraglia<sup>2</sup>, Angelica Romero<sup>2</sup>, Ludovic S. Mure<sup>3</sup>, Satchidananda Panda<sup>3</sup>, Steve Kay<sup>1\*</sup>

\*Corresponding author: Steve Kay, Ph.D., Keck School of Medicine, University of Southern California, Los Angeles, CA 90089, USA.

Email: [stevekay@usc.edu](mailto:stevekay@usc.edu)

**This PDF file includes:**

SI Materials and Methods

Figures S1 to S6

Tables S1 to S6

## **SI Materials and Methods**

### **Animals**

All animal care and experimental procedures complied with University of Southern California guidelines for the care and use of animals and were approved by the University of Southern California Animal Care and Use Committee under protocol #20826.

The *miR-183/96/182* cluster gene trap mice (miR183C GT) were obtained as a gift from Dr. Changchun Xiao at Scripps Research. The *miR-183C<sup>GT/GT</sup>; Per2<sup>Luc</sup>* reporter mice were generated by crossing *miR-183C<sup>GT/+</sup>* mice with *Per2<sup>Luc</sup>* knock-in mice. All mice were housed in a temperature- and humidity-controlled room with food and water *ad libitum*. For time-course tissue dissections, mice of each genotype at 2–3 months of age were euthanized by isoflurane at each circadian time point, and the tissues were isolated, snap-frozen, and stored at -80°C until processing for mRNA or protein analyses. For dissections of tissues during the dark phase, euthanasia of mice and dissections of eyes or retinas were performed under infrared illumination by a red lamp, and then the other tissues were dissected under the regular lights.

### **Wheel-Running Activity**

Mice were individually housed in cages equipped with running wheels, with food and water *ad libitum*. Mice were first entrained under 12 h/12 h light/dark conditions for 2 weeks, and then were released to constant darkness for 3 weeks. A ClockLab system (Actimetrics) was used to collect wheel-running activity, and control the timing of light changes. LED lights were given as a square wave 12 h/12 h light/dark cycle with an irradiance of 5 W/m<sup>2</sup> during the light phase.

### **Total Activity**

Locomotor activity was measured in polycarbonate cages (42 × 22 × 20 cm) placed into frames (25.5 × 47 cm) mounted with two levels of photocell beams at 2 and 7 cm above the bottom of the cage (San Diego Instruments, San Diego, CA, USA). These two sets of beams allowed for the recording of both horizontal (locomotion) and vertical (rearing) behaviors. The total activity was calculated as the sum of both types of behaviors. The mice were housed in the activity boxes with food and water *ad libitum*. They were first given 1 day to habituate to the testing environment. Immediately following this habituation, the mice were tested under a standard 12 h light / 12 h dark cycles for 7 days, and then constant darkness for 14 days.

### **miRNA screen**

*Per2-dLuc* and *Bmal1-dLuc* reporters cells (1) were reverse transfected with miRNAs in 384-well plates. Briefly, 20 µl of transfection reagent mixture (0.045 µl RNAiMax in Opti-MEM) was added to each well which was pre-spotted with miRNA (0.4 pmol). After 5 minutes of incubation at room temperature, 20 µl of cells (2500 cells/well) were added on top of the transfection mixture, and then were incubated at 37°C in 5% CO<sub>2</sub> condition for 48 hours before recording. To record bioluminescence of the cells, the old medium was replaced with 60 µl HEPES-buffered explant medium supplemented with luciferin (1 mM) (GoldBio), 10% FBS and antibiotics. Plates were sealed with an optically clear film and were recorded in a plate reader (Synergy, BioTek) at a 2-hour interval for 5 days under 35°C condition. AllStars Negative Control siRNA, which does not target any gene in mammalian cells and therefore has no effects on circadian rhythms, was used as the negative control. An siRNA targeting luciferase was used as the luminescence signal control, and an siRNA targeting ubiquitous human cell survival genes was used as the cell survival control. Some miRNAs that were reported to modulate circadian rhythms (2–7) were screened in the U2OS reporter cells for positive controls prior to the

genome-wide miRNA screen. Among them, none of the miRNAs had significant and consistent effects on circadian period lengths, but only miRNA-142-3p robustly lowered the amplitude by targeting BMAL1 (2, 3). We therefore used miRNA-142-3p as a positive control for amplitude. CRY2 siRNA was used as another positive control for period length. The MultiCycle program (Actimetrics, Inc.) was used to analyze circadian bioluminescence data. Data were normalized (running average 24 hour methods) to detrend the baseline, and then the circadian parameters such as period length and amplitude were estimated using the best-fit sine wave analysis.

### **CRISPR-Cas9 knockout of miRNAs in human cells**

The knockout of miRNA was performed by the CRISPR-Cas9 system with paired synthetic crRNAs. Synthetic crRNAs were designed by the Dharmacon online CRISPR Design Tool. The high specificity scoring crRNAs which targeted sequences either in or close to the miRNA stem-loop were selected. Cells of a clonal U2OS *Per2-dLuc* cell line were seeded in a 96-well plate at a density of 10,000 cells per well one day prior to the transfection. Two pairs of 50 nM crRNA:tracrRNA complex, and 200 ng Cas9 (PuroR) plasmid which express a puromycin resistant gene were co-transfected by 0.4  $\mu$ L/well DharmaFECT Duo reagent (GE Healthcare Dharmacon, Cat #T-2010-03). After 48 hours of transfection, the medium was replaced with complete medium containing 0.5  $\mu$ g/mL puromycin, and cells were incubated for 3 days. Single-cell cloning was performed by serial dilution. The genotypes of single-cell clones were first determined by PCR and 2% agarose gel electrophoresis. The positive clones were further validated by Sanger sequencing. Sequences of crRNAs and PCR primers flanking the cleavage sites are listed in SI Appendix, Table S5.

### **Luciferase Assays**

In a 384-well plate, the wells were pre-coated with 0.02% L-Lysine solutions, and then HEK-293T cells were plated at a density of 4000 cells/well. After 24 hours, the cells were co-transfected with 10 ng 3'UTR reporter plasmid and 20 nM miRNA mimics per well. The transient transfections were performed using 0.16  $\mu$ l of DharmaFECT DUO (Dharmacon) per well. Luciferase activity was measured 48 hours after transfection using the Bright-Glo™ Luciferase Assay System (Promega, Cat #E2610) on a microplate reader (Infinite M200, Tecan) according to the manufacturer's instructions.

### **RNA Isolation**

Total RNA was extracted using the RNeasy method combined with columns. Briefly, cells or tissues were homogenized in 500  $\mu$ l RNeasy RT (MRC), and mixed with 200  $\mu$ l of RNase free water. The mixture was then vortexed for 15 seconds and incubated for 15 minutes at room temperature, followed by 15 minutes centrifugation at 16 000 g. The supernatant was transferred to a fresh tube with 8  $\mu$ l of 4-Bromoanisole and vortexed for 15 seconds. After incubation at room temperature for 5 minutes, the solution was centrifuged for 10 minutes at 12 000 g. The supernatant contains RNA and was transferred to a fresh tube. The mixture of the RNA containing supernatant and 1 volume of isopropanol was filtered by Zymo-Spin™ ICG Column (Zymo). RNA was washed twice with Direct-zol™ RNA PreWash buffer, and once with RNA Wash Buffer on column, and then elute with 10-20  $\mu$ l of RNase free water. For large size tissues such as eye and lung, the reagent volumes doubled accordingly.

### **Quantitative RT-PCR**

A two-tailed RT-PCR method (8) was used for miRNA quantification. Reverse transcription (RT) reactions were performed using the iScript select cDNA kit (BioRad) in a total reaction

volume of 10  $\mu$ l, which contained 1x reaction buffer, 1  $\mu$ l of GSP enhancer solution, mix of 0.5  $\mu$ M Two-tailed RT primers, 0.5  $\mu$ l reverse transcriptase and 100 ng total RNA. The reactions were incubated at 42°C for 45 minutes, and 85°C for 5 minutes in a thermocycler. Reverse transcription (RT) reactions for mRNA were performed in a total reaction volume of 10  $\mu$ l, which contained 1x SuperScript IV VILO Master Mix (Invitrogen) and 200 ng RNA. The reactions were incubated at 25°C for 10 min, 50°C for 10 minutes and 85°C for 5 minutes in a thermocycler.

Methods for qPCR were the same for both miRNA and mRNA. One total volume of 10  $\mu$ l reaction contained 1x Maxima SYBR Green qPCR Master Mix (Thermo Scientific), 0.5  $\mu$ M forward and reverse primers, and 3  $\mu$ l of diluted cDNA template. qPCR was performed in a CFX 384 Real Time Detection System (Bio-Rad) at 95°C for 10 minutes, 40 cycles of 95°C for 15 seconds, and 60°C for 60 seconds, followed by melting-curve analysis. The primers used in qPCR analysis are listed in SI Appendix, Table S6.

### **Western Blotting**

Whole-cell extracts were prepared using lysis buffer containing 50 mM Tris (pH8), 1% TX-100, 150 mM NaCl, 12 mM Sodium Dextroglucosylate, 0.1% SDS, 10 mM EDTA, and protease inhibitor. After incubation on ice for 10 minutes, samples were centrifuged at 16 000 g, at 4°C for 20 minutes. Proteins were quantified by DC Protein Assay Kit (BioRad). Gel electrophoresis was run in Criterion TGX Stain-Free Gels (BioRad). Antibodies were anti-PER2 polyclonal (ProteinTech # 20359-1-AP) and anti-GAPDH (ProteinTech # 10494-1-AP).

### **Bioluminescence recording of tissues from *Per2<sup>Luc</sup>* reporter mice**

The *miR-183*<sup>GT/GT</sup>; *Per2*<sup>Luc</sup> mice and littermate wild-type control mice were euthanized by isoflurane 2-3 hours before lights off (ZT 9–ZT10) and tissues were immediately removed into ice-cold HBSS (Gibco). Coronal brain slices containing SCN (400  $\mu$ m thickness) were cut using a tissue slicer (Stoelting). The bilateral SCN tissue without optic chiasm attached was further dissected out from the brain slice with a sterile scalpel under a dissecting microscope. The SCN cultures were cultured on cell culture inserts (PICMORG50; Millipore) in sealed 35 mm culture dishes containing 1.5mL DMEM supplemented with 1 x B-27 plus (Gibco), 352.5  $\mu$ g/mL sodium bicarbonate, 10 mM Hepes (Gibco), 25 U/mL penicillin, 25  $\mu$ g/mL streptomycin (Gibco), and 0.1 mM D-luciferin potassium salt (GoldBio). Retinas were isolated from the eye and then gently placed on culture inserts (PICMORG50; Millipore) with ganglion cell down in Neurobasal plus medium (Gibco) containing 1 x B-27 plus (Gibco) and 2% FBS (Atlanta Biologicals), 25 U/mL penicillin, 25  $\mu$ g/mL streptomycin (Gibco), and 2 mM GlutaMAX (Gibco). Bioluminescence was measured with a LumiCycle instrument (Actimetrics, Wilmette, IL). Cultures were maintained in a light-tight incubator at 37°C for one week. Data were analyzed by using the LM fit (damped sin) method in LumiCycle data analysis software (Actimetrics). The time of the peak of luminescence on the first day of constant conditions (first day in LumiCycle) was determined as the time of peak of the sine wave on that day.

### **Statistical Analysis**

The statistical significance was determined by unpaired Student's two tailed t-test if there were only two groups of data to compare. In cases of comparing multiple conditions, ordinary one-way ANOVA and Tukey post hoc tests were applied. P values of less than 0.05 were considered significant.

## References

1. A. C. Liu, *et al.*, Redundant function of REV-ERB $\alpha$  and  $\beta$  and non-essential role for Bmal1 cycling in transcriptional regulation of intracellular circadian rhythms. *PLoS Genet.* **4** (2008).
2. X. Tan, *et al.*, Clock-controlled mir-142-3p can target its activator, Bmal1. *BMC Mol. Biol.* **13**, 27 (2012).
3. V. R. Shende, N. Neuendorff, D. J. Earnest, Role of miR-142-3p in the Post-Transcriptional Regulation of the Clock Gene Bmal1 in the Mouse SCN. *PLoS One* **8**, e65300 (2013).
4. R. Nagel, L. Clijsters, R. Agami, The miRNA-192/194 cluster regulates the Period gene family and the circadian clock. *FEBS J.* **276**, 5447–5455 (2009).
5. V. R. Shende, M. M. Goldrick, S. Ramani, D. J. Earnest, Expression and rhythmic modulation of circulating micornas targeting the clock gene Bmal1 in mice. *PLoS One* **6** (2011).
6. H. Y. M. Cheng, *et al.*, microRNA Modulation of Circadian-Clock Period and Entrainment. *Neuron* **54**, 813–829 (2007).
7. S. Kojima, D. Gatfield, C. C. Esau, C. B. Green, MicroRNA-122 Modulates the Rhythmic Expression Profile of the Circadian Deadenylase Nocturnin in Mouse Liver. *PLoS One* **5**, e11264 (2010).
8. P. Androvic, L. Valihrach, J. Elling, R. Sjoback, M. Kubista, Two-tailed RT-qPCR: A novel method for highly accurate miRNA quantification. *Nucleic Acids Res.* **45** (2017).



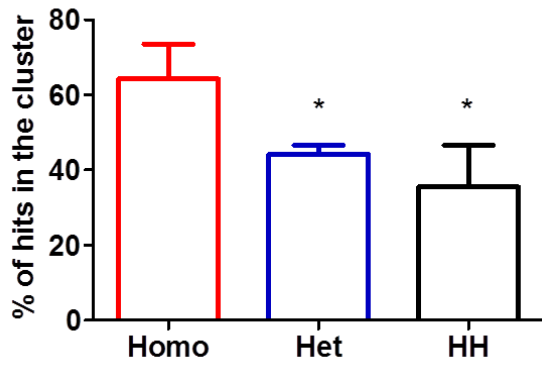

**Fig. S1.** Homo-seed clusters (Homo) have a significantly higher percentage of candidate miRNA enrichment than that of hetero-seed clusters (Het) and homo-hetero-seed clusters (HH). \*  $p < 0.05$ . Data represent the mean  $\pm$  SEM.

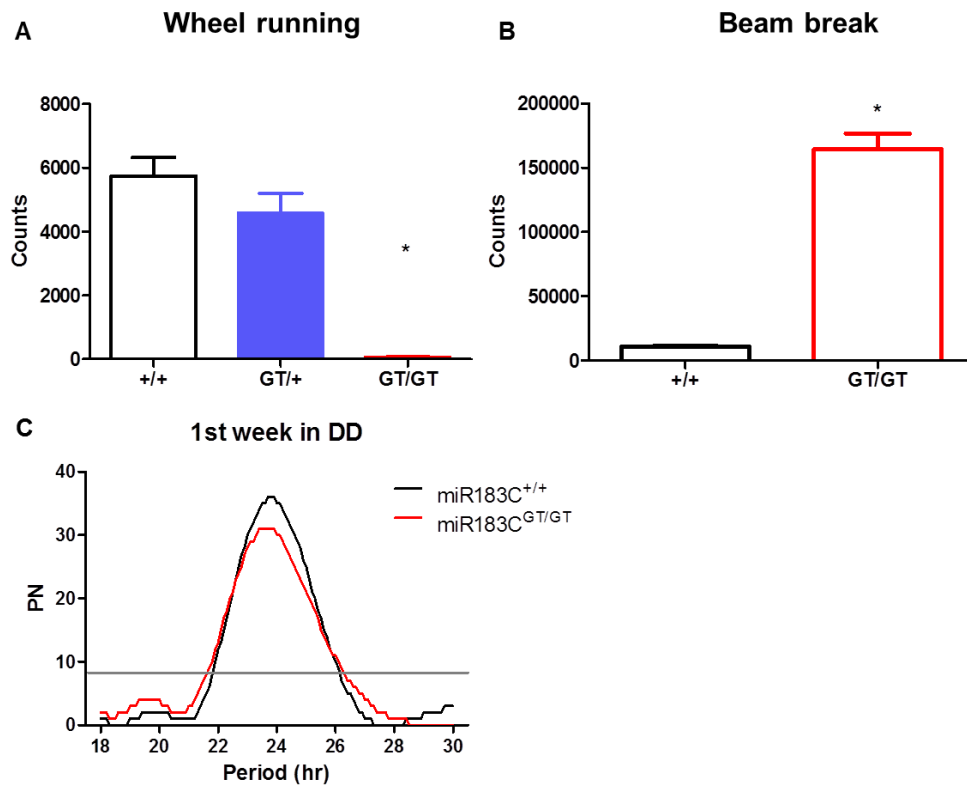

**Fig. S2.** (A) *miR-183C<sup>GT/GT</sup>* mice had significantly lower daily activity on running wheels than wild-type mice. (B) The general daily activity of *miR-183C<sup>GT/GT</sup>* mice was significantly higher than that of wild-type mice. \*  $p < 0.05$ . Data represent the mean  $\pm$  SEM. (C) Circadian periodicity of the beam-break total activity in the first week of DD condition was detected by Lomb-Scargle Periodogram. Both wild-type and mutant mice had similar period lengths.

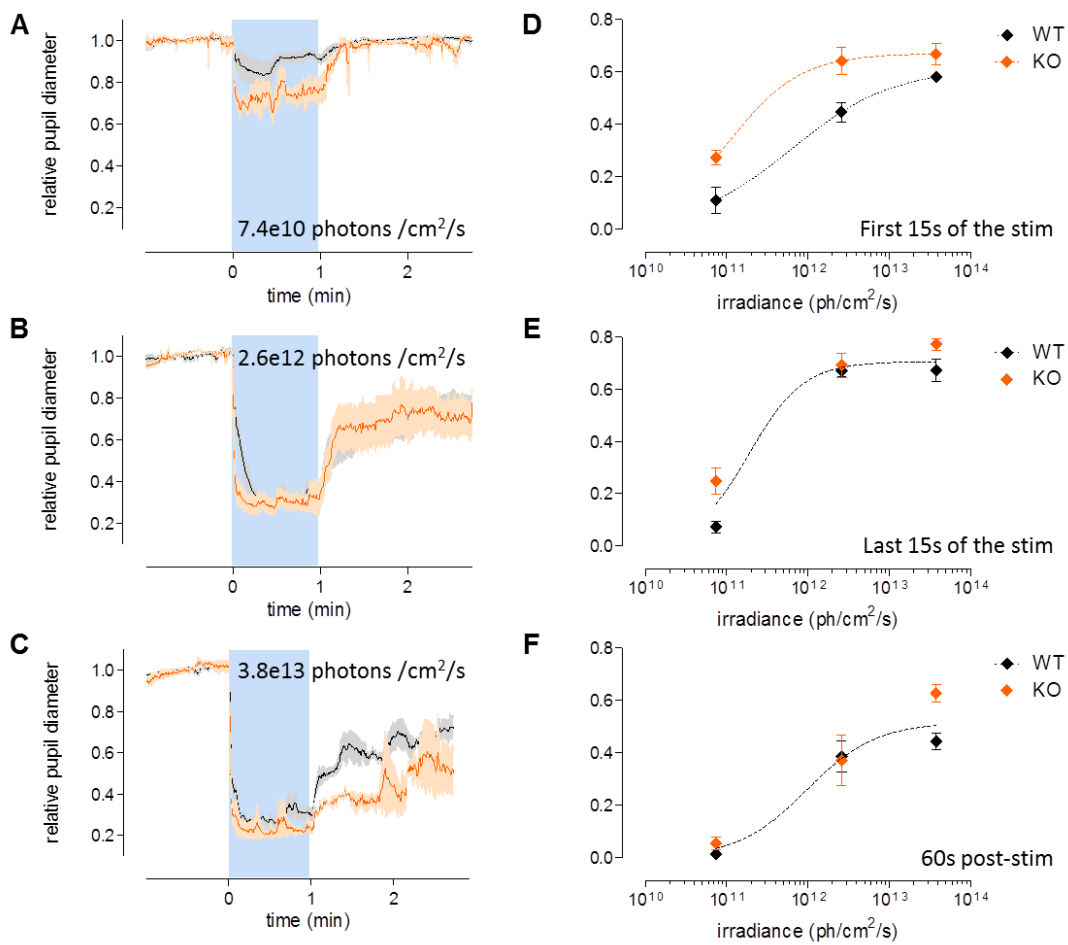

**Fig. S3.** Pupillary light reflex mediated by melanopsin was not diminished. (A-C) Average pupil diameter (normalized to baseline) in response to 1 min monochromatic blue light stimulation at increasing irradiance (480 nm,  $7.4 \times 10^{10}$ ,  $2.6 \times 10^{12}$ , and  $3.8 \times 10^{13}$  photons/cm<sup>2</sup>/s). Each 5-min recording sequence consisted of 1 min of darkness for baseline, 1 min of monochromatic 480 nm light for stimulation (blue shade), and finally 3 min of darkness for recovery. Results from the first 15 seconds during stimulation, the last 15 seconds during stimulation, and the first 60 seconds of post-stimulation were used for assessing the responses between mice of different genotypes, and were summarized in (D-F). Results from the 60s post-stimulation of  $2.6 \times 10^{12}$  photons indicated that the pupillary light reflex mediated by melanopsin were comparable between *miR-183*<sup>GT/GT</sup> (WT) and *miR-183*<sup>GT/GT</sup> (KO) mice. Data represent the mean  $\pm$  SEM.

CLOCK-3'UTR :: miR96

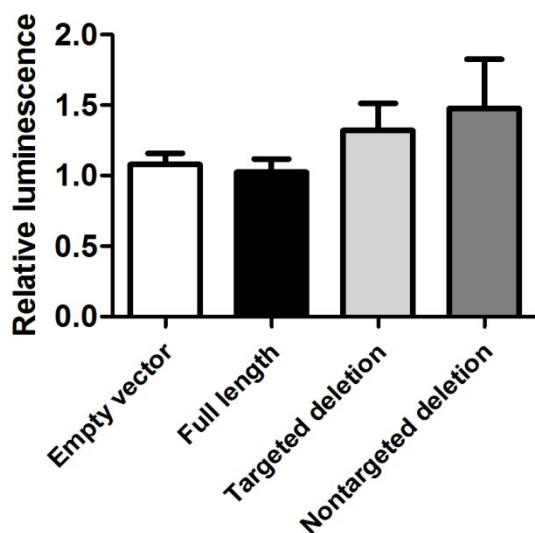

**Fig. S4.** HEK-293T cells were transfected with a luciferase reporter plasmid containing either no 3'UTR, or the CLOCK-3'UTR with wild-type, mutated target site of miR-96 (273\_278 del: TGCCAA), or mutated non-target site of miR-96 (1054\_1076 del: CACAAAACATCTTAGGCACTTTT). No statistical significance was identified in ANOVA and post hoc tests. Data represent the mean  $\pm$  SEM.

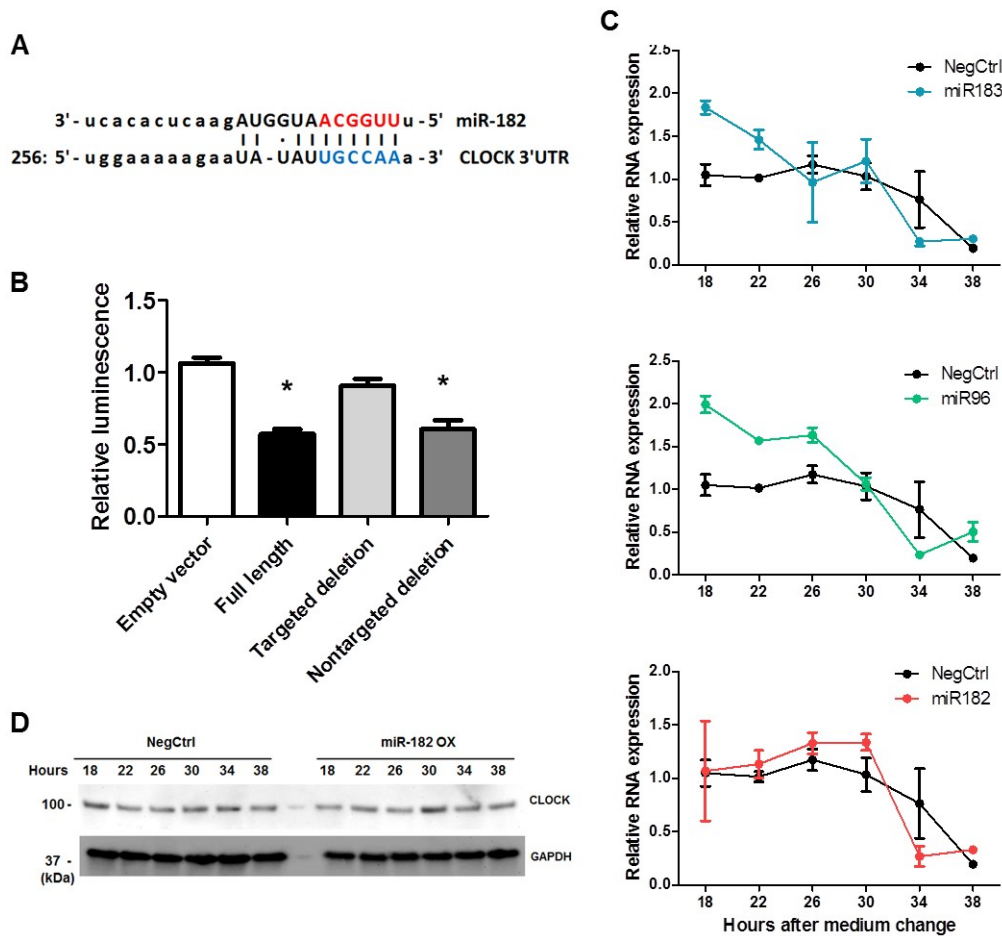

**Fig. S5.** (A) Sequence alignment between miR-182 and its putative binding site (blue letters) in CLOCK-3'UTR. Red letters indicate canonical seed nucleotides. (B) HEK-293T cells were transfected with a luciferase reporter plasmid containing either no 3'UTR, or the CLOCK-3'UTR with wild-type, mutated target site (273\_278 del: TGCCAA), or mutated non-target site of miR-182 (1054\_1076 del: CACAAAACATCTTAGGCACTTTT). \*  $p < 0.05$ . (C) CLOCK mRNA expression in U2OS cells transfected with miRNA mimics of each member of the miR-183/96/182 cluster. RNA was sampled every 4 hours 18 hours after medium change. (D) U2OS cells were transfected with either control or miR-182 mimics. CLOCK protein levels were analyzed by western blot 18 hours after medium change. Data represent the mean  $\pm$  SEM.

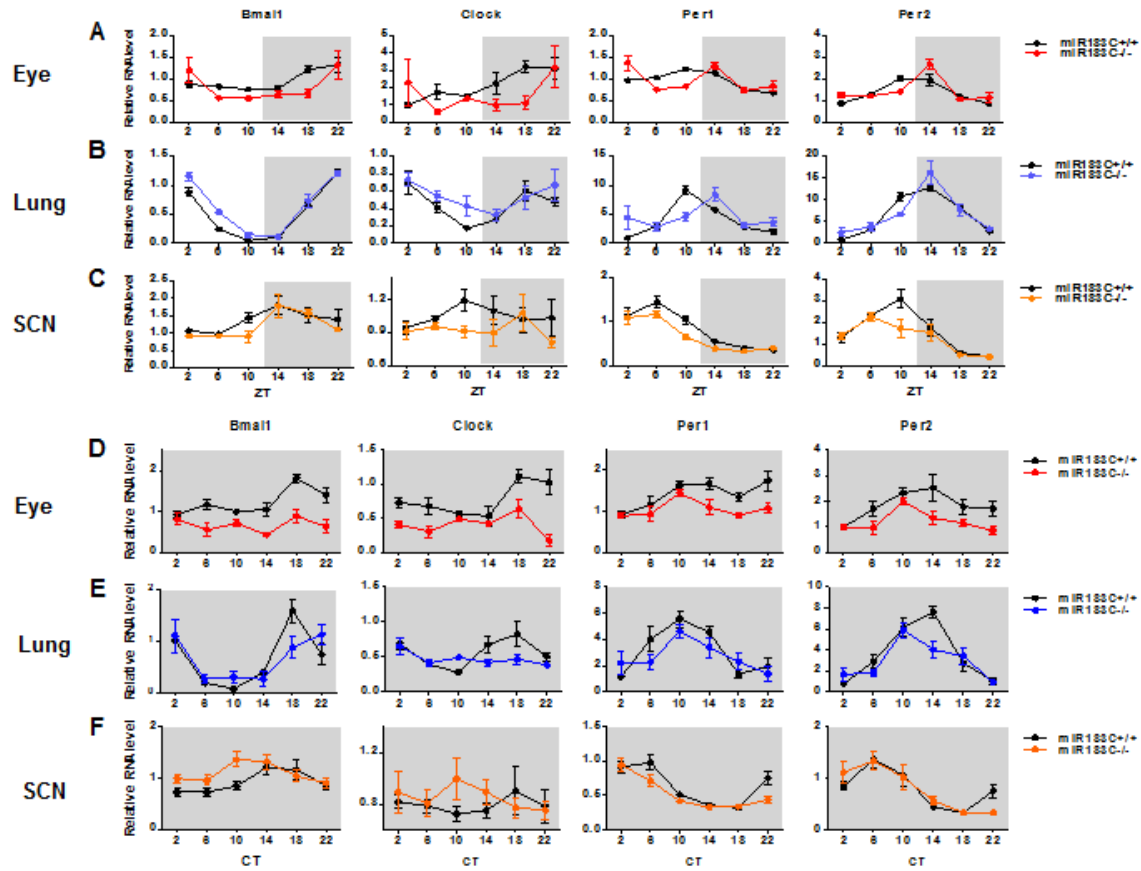

**Fig. S6.** Tissues of the whole eye (A and D), the lung (B and E), and the SCN (C and F) from either *miR-183<sup>+/+</sup>* mice or *miR-183<sup>GT/GT</sup>* mice were sampled every 4 hours across 24 hours either under LD (top panel) or DD (bottom panel) conditions. The relative mRNA of core circadian genes was measured by qPCR (n = 4~5). Data represent the mean  $\pm$  SEM.

**Table S1.** Candidate miRNA hits affecting period length.

| <b>miRNA Names</b> | <b>miRNA Seq</b>        | <b>Period Phenotype</b> |
|--------------------|-------------------------|-------------------------|
| hsa-let-7a         | UGAGGUAGUAGGUUGUAUAGUU  | Long                    |
| hsa-let-7c         | UGAGGUAGUAGGUUGUAUGGUU  | Long                    |
| hsa-let-7d         | AGAGGUAGUAGGUUGCAUAGUU  | Long                    |
| hsa-let-7e         | UGAGGUAGGAGGUUGUAUAGUU  | Long                    |
| hsa-let-7f         | UGAGGUAGUAGAUUGUAUAGUU  | Long                    |
| hsa-let-7g         | UGAGGUAGUAGUUUGUACAGUU  | Long                    |
| hsa-let-7g*        | CUGUACAGGCCACUGCCUUGC   | Long                    |
| hsa-let-7i*        | CUGCGCAAGCUACUGCCUUGC   | Long                    |
| hsa-miR-101*       | CAGUUAUCACAGUGCUGAUGCU  | Long                    |
| hsa-miR-103        | AGCAGCAUUGUACAGGGCUAUGA | Long                    |
| hsa-miR-103-as     | UCAUAGCCCUGUACAAUGCUGCU | Long                    |
| hsa-miR-106a       | AAAAGUGCUUACAGUGCAGGUAG | Long                    |
| hsa-miR-106b       | UAAAGUGCUGACAGUGCAGAU   | Long                    |
| hsa-miR-10a*       | CAAUUCGUAUCUAGGGGAAUA   | Long                    |
| hsa-miR-1178       | UUGCUCACUGUUCUCCCUAG    | Long                    |
| hsa-miR-1184       | CCUGCAGCGACUUGAUGGCUUCC | Long                    |
| hsa-miR-1204       | UCGUGGCCUGGUCUCCAUAU    | Long                    |
| hsa-miR-1205       | UCUGCAGGGUUUGCUUUGAG    | Long                    |
| hsa-miR-1224-3p    | CCCCACCUCCUCUCUCCUCAG   | Long                    |
| hsa-miR-1224-5p    | GUGAGGACUCGGGAGGUGG     | Long                    |
| hsa-miR-1227       | CGUGCCACCCUUUCCCCAG     | Long                    |
| hsa-miR-1233       | UGAGCCCUGUCCUCCCGCAG    | Long                    |
| hsa-miR-124        | UAAGGCACGCGGUGAAUGCC    | Long                    |
| hsa-miR-1250       | ACGGUGCUGGAUGUGCCUUU    | Long                    |
| hsa-miR-126        | UCGUACCGUGAGUAAUAAUGCG  | Long                    |

|                |                         |      |
|----------------|-------------------------|------|
| hsa-miR-1276   | UAAAGAGCCCUGUGGAGACA    | Long |
| hsa-miR-1285   | UCUGGGCAACAAAGUGAGACCU  | Long |
| hsa-miR-129-5p | CUUUUUGCGGUCUGGGCUUGC   | Long |
| hsa-miR-1296   | UUAGGGCCCUGGCUCCAUCUCC  | Long |
| hsa-miR-1304   | UUUGAGGCUACAGUGAGAUGUG  | Long |
| hsa-miR-1305   | UUUUCAACUCUAAUGGGAGAGA  | Long |
| hsa-miR-1306   | ACGUUGGCUCUGGUGGUG      | Long |
| hsa-miR-130b*  | ACUCUUUCCCUGUUGCACUAC   | Long |
| hsa-miR-132    | UACAGUCUACAGCCAUGGUCG   | Long |
| hsa-miR-145    | GUCCAGUUUCCCAGGAUCCCU   | Long |
| hsa-miR-148a   | UCAGUGCACUACAGAACUUUGU  | Long |
| hsa-miR-148a*  | AAAGUUCUGAGACACUCCGACU  | Long |
| hsa-miR-148b*  | AAGUUCUGUUUAUACACUCAGGC | Long |
| hsa-miR-149    | UCUGGCUCCGUGUCUUCACUCCC | Long |
| hsa-miR-150    | UCUCCAACCCUUGUACCAGUG   | Long |
| hsa-miR-15a    | UAGCAGCACAUAUUGGUUUGUG  | Long |
| hsa-miR-17     | CAAAGUGCUUACAGUGCAGGUAG | Long |
| hsa-miR-182*   | UGGUUCUAGACUUGCCAACUA   | Long |
| hsa-miR-183    | UAUGGCACUGGUAGAAUUCACU  | Long |
| hsa-miR-184    | UGGACGGAGAACUGAUUAGGGU  | Long |
| hsa-miR-185*   | AGGGGCUGGCUUCCUCUGGUC   | Long |
| hsa-miR-186    | CAAAGAAUUCUCCUUUUGGGCU  | Long |
| hsa-miR-188-5p | CAUCCCUUGCAUGGUGGAGGG   | Long |
| hsa-miR-18a*   | ACUGCCCUAAGUGCUCUUCUGG  | Long |
| hsa-miR-190b   | UGAUUUGUUUGAUUUGGGUU    | Long |
| hsa-miR-19a*   | AGUUUUGCAUAGUUGCACUACA  | Long |
| hsa-miR-19b-1* | AGUUUUGCAGGUUUGCAUCCAGC | Long |
| hsa-miR-19b-2* | AGUUUUGCAGGUUUGCAUUUCA  | Long |



|                |                         |      |
|----------------|-------------------------|------|
| hsa-miR-204    | UUCCCUUUGUCAUCCUAUGCCU  | Long |
| hsa-miR-210    | CUGUGCGUGUGACAGCGGCUGA  | Long |
| hsa-miR-211    | UUCCCUUUGUCAUCCUUCGCCU  | Long |
| hsa-miR-216a   | UAAUCUCAGCUGGCAACUGUGA  | Long |
| hsa-miR-23a    | AUCACAUUGCCAGGGAUUUCC   | Long |
| hsa-miR-23a*   | GGGGUUCCUGGGGAUGGGAUUU  | Long |
| hsa-miR-23b*   | UGGGUUCCUGGCAUGCUGAUUU  | Long |
| hsa-miR-29b-2* | CUGGUUUCACAUGGUGGCUUAG  | Long |
| hsa-miR-302d*  | ACUUUAACAUGGAGGCACUUGC  | Long |
| hsa-miR-323-5p | AGGUGGUCCGUGGCGGUUCGC   | Long |
| hsa-miR-325    | CCUAGUAGGUGUCCAGUAAGUGU | Long |
| hsa-miR-330-3p | GCAAAGCACACGGCCUGCAGAGA | Long |
| hsa-miR-330-5p | UCUCUGGGCCUGUGUCUAGGC   | Long |
| hsa-miR-338-5p | AACAAUAUCCUGGUGCUGAGUG  | Long |
| hsa-miR-33a    | GUGCAUUGUAGUUGCAUUGCA   | Long |
| hsa-miR-33b    | GUGCAUUGCUGUUGCAUUGC    | Long |
| hsa-miR-33b*   | CAGUGCCUCGGCAGUGCAGCCC  | Long |
| hsa-miR-34a*   | CAAUCAGCAAGUAUACUGCCCU  | Long |
| hsa-miR-374a   | UUUAUACAACCUAGUAAGUG    | Long |
| hsa-miR-374b   | AUAUAAUACAACCUAGUAAGUG  | Long |
| hsa-miR-377*   | AGAGGUUGCCCUUGGUGAAUUC  | Long |
| hsa-miR-378*   | CUCCUGACUCCAGGUCCUGUGU  | Long |
| hsa-miR-380*   | UGGUUGACCAUAGAACAUGCGC  | Long |
| hsa-miR-409-5p | AGGUUACCCGAGCAACUUUGCAU | Long |
| hsa-miR-411    | UAGUAGACCGUAUAGCGUACG   | Long |
| hsa-miR-421    | AUCAACAGACAUAAUUGGGCGC  | Long |
| hsa-miR-431    | UGUCUUGCAGGCCGUAUGCA    | Long |
| hsa-miR-491-3p | CUUAUGCAAGAUUCCCUUCUAC  | Long |

|                 |                          |      |
|-----------------|--------------------------|------|
| hsa-miR-493*    | UUGUACAUGGUAGGCUUUCAUU   | Long |
| hsa-miR-502-3p  | AAUGCACCUUGGGCAAGGAUUCA  | Long |
| hsa-miR-511     | GUGUCUUUJGCUCUGCAGUCA    | Long |
| hsa-miR-513a-3p | UAAAUUUCACCUUUCUGAGAAGG  | Long |
| hsa-miR-518c*   | UCUCUGGAGGGAAGCACUUUCUG  | Long |
| hsa-miR-518d-3p | CAAAGCGCUUCCCUUUGGAGC    | Long |
| hsa-miR-518f    | GAAAGCGCUUCUCUUUAGAGG    | Long |
| hsa-miR-544     | AUUCUGCAUUUUUAGCAAGUUC   | Long |
| hsa-miR-571     | UGAGUUGGCCAUCUGAGUGAG    | Long |
| hsa-miR-572     | GUCCGCUCGGCGGUGGCCCA     | Long |
| hsa-miR-592     | UUGUGUCAAU AUGCGAUGAUGU  | Long |
| hsa-miR-605     | UAAAUCCCAUGGUGCCUUCUCCU  | Long |
| hsa-miR-610     | UGAGCUAAAUGUGUGCUGGGA    | Long |
| hsa-miR-620     | AUGGAGAUAGAUAUAGAAAU     | Long |
| hsa-miR-629*    | GUUCUCCCAACGUAAGCCCAGC   | Long |
| hsa-miR-633     | CUAAUAGUAUCUACCACAAUAAA  | Long |
| hsa-miR-641     | AAAGACAUAGGAUAGAGUCACCUC | Long |
| hsa-miR-647     | GUGGCUGCACUCACUCCUUC     | Long |
| hsa-miR-664     | UAUUCAUUUAUCCCCAGCCUACA  | Long |
| hsa-miR-671-3p  | UCCGGUUCUCAGGGCUCCACC    | Long |
| hsa-miR-7       | UGGAAGACUAGUGAUUUUGUUGU  | Long |
| hsa-miR-7-2*    | CAACAAUCCAGUCUACCUAA     | Long |
| hsa-miR-744     | UGCGGGGCUAGGGCUAACAGCA   | Long |
| hsa-miR-744*    | CUGUUGCCACUAACCUCAACCU   | Long |
| hsa-miR-770-5p  | UCCAGUACCACGUGUCAGGGCCA  | Long |
| hsa-miR-802     | CAGUAACAAAGAUUCAUCCUUGU  | Long |

|                 |                          |       |
|-----------------|--------------------------|-------|
| hsa-miR-887     | GUGAACGGGCGCCAUCCCGAGG   | Long  |
| hsa-miR-891b    | UGCAACUUACCUGAGUCAUUGA   | Long  |
| hsa-miR-92a-1*  | AGGUUGGGAUUCGGUUGCAAUGCU | Long  |
| hsa-miR-934     | UGUCUACUACUGGAGACACUGG   | Long  |
| hsa-miR-96      | UUUGGCACUAGCACAUUUUUGCU  | Long  |
| hsa-miR-96*     | AAUCAUGUGCAGUGCCAAUAUG   | Long  |
| hsa-miR-181c    | AACAUUCAACCUGUCGGUGAGU   | Short |
| hsa-miR-193a-3p | AACUGGCCUACAAAGUCCCAGU   | Short |
| hsa-miR-29a     | UAGCACCAUCUGAAAUCGGUUA   | Short |
| hsa-miR-29c     | UAGCACCAUUUGAAAUCGGUUA   | Short |
| hsa-miR-365     | UAAUGCCCCUAAAAUCCUUAU    | Short |
| hsa-miR-433     | AUCAUGAUGGGCUCCUCGGUGU   | Short |
| hsa-miR-933     | UGUGCGCAGGGAGACCUCUCCC   | Short |

---

**Table S2.** Gene family information for each candidate miRNA hit.

| <b>miRNA Names</b> | <b>Gene family</b> |
|--------------------|--------------------|
| hsa-let-7f         | let-7              |
| hsa-let-7a         | let-7              |
| hsa-let-7d         | let-7              |
| hsa-let-7c         | let-7              |
| hsa-let-7e         | let-7              |
| hsa-let-7g*        | let-7              |
| hsa-let-7g         | let-7              |
| hsa-let-7i*        | let-7              |
| hsa-miR-10a*       | mir-10             |
| hsa-miR-101*       | mir-101            |
| hsa-miR-103-as     | mir-103            |
| hsa-miR-103        | mir-103            |
| hsa-miR-1178       | mir-1178           |
| hsa-miR-1184       | mir-1184           |
| hsa-miR-1204       | mir-1204           |
| hsa-miR-1205       | mir-1205           |
| hsa-miR-1224-5p    | mir-1224           |
| hsa-miR-1224-3p    | mir-1224           |
| hsa-miR-1227       | mir-1227           |
| hsa-miR-1233       | mir-1233           |
| hsa-miR-124        | mir-124            |
| hsa-miR-1250       | mir-1250           |
| hsa-miR-126        | mir-126            |
| hsa-miR-1276       | mir-1276           |
| hsa-miR-1285       | mir-1285           |

|                |          |
|----------------|----------|
| hsa-miR-129-5p | mir-129  |
| hsa-miR-1296   | mir-1296 |
| hsa-miR-130b*  | mir-130  |
| hsa-miR-1304   | mir-1304 |
| hsa-miR-1305   | mir-1305 |
| hsa-miR-1306   | mir-1306 |
| hsa-miR-132    | mir-132  |
| hsa-miR-145    | mir-145  |
| hsa-miR-148b*  | mir-148  |
| hsa-miR-148a   | mir-148  |
| hsa-miR-148a*  | mir-148  |
| hsa-miR-149    | mir-149  |
| hsa-miR-15a    | mir-15   |
| hsa-miR-150    | mir-150  |
| hsa-miR-323-5p | mir-154  |
| hsa-miR-377*   | mir-154  |
| hsa-miR-409-5p | mir-154  |
| hsa-miR-106a   | mir-17   |
| hsa-miR-106b   | mir-17   |
| hsa-miR-18a*   | mir-17   |
| hsa-miR-17     | mir-17   |
| hsa-miR-181c   | mir-181  |
| hsa-miR-182*   | mir-182  |
| hsa-miR-183    | mir-183  |
| hsa-miR-184    | mir-184  |
| hsa-miR-185*   | mir-185  |
| hsa-miR-186    | mir-186  |
| hsa-miR-188-5p | mir-188  |

|                 |         |
|-----------------|---------|
| hsa-miR-19b-2*  | mir-19  |
| hsa-miR-19b-1*  | mir-19  |
| hsa-miR-19a*    | mir-19  |
| hsa-miR-190b    | mir-190 |
| hsa-miR-193a-3p | mir-193 |
| hsa-miR-204     | mir-204 |
| hsa-miR-211     | mir-204 |
| hsa-miR-210     | mir-210 |
| hsa-miR-216a    | mir-216 |
| hsa-miR-23b*    | mir-23  |
| hsa-miR-23a*    | mir-23  |
| hsa-miR-23a     | mir-23  |
| hsa-miR-92a-1*  | mir-25  |
| hsa-miR-29a     | mir-29  |
| hsa-miR-29c     | mir-29  |
| hsa-miR-29b-2*  | mir-29  |
| hsa-miR-302d*   | mir-302 |
| hsa-miR-325     | mir-325 |
| hsa-miR-33b*    | mir-33  |
| hsa-miR-33b     | mir-33  |
| hsa-miR-33a     | mir-33  |
| hsa-miR-330-3p  | mir-330 |
| hsa-miR-330-5p  | mir-330 |
| hsa-miR-338-5p  | mir-338 |
| hsa-miR-34a*    | mir-34  |
| hsa-miR-365     | mir-365 |
| hsa-miR-374a    | mir-374 |
| hsa-miR-374b    | mir-374 |

|                 |         |
|-----------------|---------|
| hsa-miR-378*    | mir-378 |
| hsa-miR-380*    | mir-379 |
| hsa-miR-411     | mir-379 |
| hsa-miR-431     | mir-431 |
| hsa-miR-433     | mir-433 |
| hsa-miR-491-3p  | mir-491 |
| hsa-miR-493*    | mir-493 |
| hsa-miR-502-3p  | mir-500 |
| hsa-miR-513a-3p | mir-506 |
| hsa-miR-511     | mir-506 |
| hsa-miR-518c*   | mir-515 |
| hsa-miR-518f    | mir-515 |
| hsa-miR-518d-3p | mir-515 |
| hsa-miR-544     | mir-544 |
| hsa-miR-571     | mir-571 |
| hsa-miR-572     | mir-572 |
| hsa-miR-592     | mir-592 |
| hsa-miR-605     | mir-605 |
| hsa-miR-610     | mir-610 |
| hsa-miR-629*    | mir-629 |
| hsa-miR-633     | mir-633 |
| hsa-miR-641     | mir-641 |
| hsa-miR-647     | mir-647 |
| hsa-miR-664     | mir-664 |
| hsa-miR-671-3p  | mir-671 |
| hsa-miR-7-2*    | mir-7   |
| hsa-miR-7       | mir-7   |

|                |         |
|----------------|---------|
| hsa-miR-744*   | mir-744 |
| hsa-miR-744    | mir-744 |
| hsa-miR-770-5p | mir-770 |
| hsa-miR-802    | mir-802 |
| hsa-miR-887    | mir-887 |
| hsa-miR-891b   | mir-891 |
| hsa-miR-933    | mir-933 |
| hsa-miR-934    | mir-934 |
| hsa-miR-421    | mir-95  |
| hsa-miR-96*    | mir-96  |
| hsa-miR-96     | mir-96  |

---



**Table S3.** Gene cluster information for each candidate miRNA hit and the categories based on seed sequence similarity. Red color denotes the miRNAs identified from the screen.

| Category | miRNA cluster                                                                                                                                                                                                                                                                                                                                                                                                     |
|----------|-------------------------------------------------------------------------------------------------------------------------------------------------------------------------------------------------------------------------------------------------------------------------------------------------------------------------------------------------------------------------------------------------------------------|
| Homo     | let-7a-1; let-7f-1; let-7d                                                                                                                                                                                                                                                                                                                                                                                        |
| Homo     | mir-29c; mir-29b-2                                                                                                                                                                                                                                                                                                                                                                                                |
| Homo     | mir-132; mir-212                                                                                                                                                                                                                                                                                                                                                                                                  |
| Homo     | mir-16-1; mir-15a                                                                                                                                                                                                                                                                                                                                                                                                 |
| Homo     | mir-181c; mir-181d                                                                                                                                                                                                                                                                                                                                                                                                |
| Homo     | mir-29a; mir-29b-1                                                                                                                                                                                                                                                                                                                                                                                                |
| Homo     | mir-301b; mir-130b                                                                                                                                                                                                                                                                                                                                                                                                |
| HH       | mir-379; mir-411; mir-299; mir-380; mir-1197; mir-323a; mir-758; mir-329-1; mir-329-2; mir-494; mir-1193; mir-543; mir-495; mir-376c; mir-376a-2; mir-654; mir-376b; mir-376a-1; mir-300; mir-1185-1; mir-1185-2; mir-381; mir-487b; mir-539; mir-889; mir-544a; mir-655; mir-487a; mir-382; mir-134; mir-668; mir-485; mir-323b; mir-154; mir-496; mir-377; mir-541; mir-409; mir-412; mir-369; mir-410; mir-656 |
| HH       | mir-17; mir-18a; mir-19a; mir-20a; mir-19b-1; mir-92a-1                                                                                                                                                                                                                                                                                                                                                           |
| HH       | 512-1; 512-2; 1323; 498; 520e; 515-1; 519e; 520f; 515-2; 519c; 1283-1; 520a; 526b; 519b; 525; 523; 518f; 520b; 518b; 526a-1; 520c; 518c; 524; 517a; 519d; 521-2; 520d; 517b; 520g; 516b-2; 526a-2; 518e; 518a-1; 518d; 516b-1; 518a-2; 517c; 520h; 521-1; 522; 519a-1; 527; 516a-1; 1283-2; 516a-2; 519a-2                                                                                                        |
| HH       | mir-106a; mir-18b; mir-20b; mir-19b-2; mir-92a-2; mir-363                                                                                                                                                                                                                                                                                                                                                         |
| HH       | mir-106b; mir-93; mir-25                                                                                                                                                                                                                                                                                                                                                                                          |
| HH       | mir-302b; mir-302c; mir-302a; mir-302d; mir-367                                                                                                                                                                                                                                                                                                                                                                   |
| HH       | mir-532; mir-188; mir-500a; mir-362; mir-501; mir-500b; mir-660; mir-502                                                                                                                                                                                                                                                                                                                                          |
| HH       | mir-891b; mir-892b; mir-892a; mir-888; mir-890; mir-892c                                                                                                                                                                                                                                                                                                                                                          |
| HH       | mir-183; mir-96; mir-182                                                                                                                                                                                                                                                                                                                                                                                          |
| Hetero   | mir-1250; mir-338; mir-657                                                                                                                                                                                                                                                                                                                                                                                        |
| Hetero   | mir-439; mir-337; mir-665; mir-431; mir-433; mir-127; mir-432; mir-136                                                                                                                                                                                                                                                                                                                                            |
| Hetero   | mir-101; mir-3671                                                                                                                                                                                                                                                                                                                                                                                                 |

---

|        |                                     |
|--------|-------------------------------------|
| Hetero | mir-1179; <b>mir-7-2</b>            |
| Hetero | mir-143; <b>mir-145</b>             |
| Hetero | mir-193b; <b>mir-365a</b>           |
| Hetero | mir-217; <b>mir-216a</b>            |
| Hetero | <b>mir-23b</b> ; mir-27b; mir-24-1  |
| Hetero | mir-24-2; mir-27a; <b>mir-23a</b>   |
| Hetero | <b>mir-33b</b> ; mir-6777           |
| Hetero | mir-3618; <b>mir-1306</b>           |
| Hetero | <b>mir-374a</b> ; mir-545           |
| Hetero | <b>mir-374b</b> ; <b>mir-421</b>    |
| Hetero | <b>mir-493</b> ; mir-337; mir-665   |
| Hetero | mir-507; mir-506; <b>mir-513a-2</b> |
| Hetero | <b>mir-647</b> ; mir-1914           |
| Hetero | mir-6789; <b>mir-1227</b>           |
| Hetero | mir-99a; <b>let-7c</b> ; mir-125b-2 |
| Hetero | mir-99b; <b>let-7e</b> ; mir-125a   |

---

**Table S4.** Predicted targets for members of miR-183 cluster by different methods.

|       | <b>miR-183</b> | <b>miR-96</b>  | <b>miR182</b>  |
|-------|----------------|----------------|----------------|
| BMAL1 | -              | -              | -              |
| CLOCK | Diana          | miRanda, Diana | miRanda, Diana |
| CRY1  | -              | -              | -              |
| CRY2  | -              | -              | -              |
| PER1  | -              | -              | -              |
| PER2  | -              | miRanda, Diana | Diana          |

**Table S5.** RNA sequences for CRISPR.

| miRNA       | crRNA        | Target Sequence          | PAM | Genomic Location (Strand)        | Specificity | Specificity Score | Deletion size |
|-------------|--------------|--------------------------|-----|----------------------------------|-------------|-------------------|---------------|
| has-miR-183 | crRNA-478166 | TCCTGTTCTGT<br>GTATGGCAC | TGG | chr7:129774978<br>-129775000 (-) | High        | 30.8              | 56nt          |
|             | crRNA-478167 | ATCTGTCTCTG<br>CTCTGTTTA | TGG | chr7:129774911<br>-129774933 (+) | High        | 36.35             |               |
| has-miR-96  | crRNA-478172 | GCCATCTGCT<br>TGGCCGATTT | TGG | chr7:129774757<br>-129774779 (-) | High        | 10.25             | 62nt          |
|             | crRNA-478174 | ATCATGTGCA<br>GTGCCAATAT | GGG | chr7:129774695<br>-129774717 (-) | High        | 15.7              |               |
| has-miR-182 | crRNA-454327 | GGCAATGGTA<br>GAACTCACAC | TGG | chr7:129770445<br>-129770467 (-) | High        | 17.7              | 43nt          |
|             | crRNA-454328 | GTTCTAGACT<br>TGCCAATAT  | GGG | chr7:129770402<br>-129770424 (-) | High        | 9.15              |               |

**Table S6.** Primers for qPCR.

| <b>Primer</b> | <b>Sequence</b>                                                | <b>Species</b>     | <b>Usage</b>           |
|---------------|----------------------------------------------------------------|--------------------|------------------------|
| Gapdh_F       | TGACCTCAACTACATGGTCTACA                                        | Mouse              | qPCR primer for mRNA   |
| Gapdh_R       | CTTCCCATTCTCGGCCTTG                                            | Mouse              | qPCR primer for mRNA   |
| Bmal1_F       | CCCCTGAACATCACAAAGTA                                           | Mouse              | qPCR primer for mRNA   |
| Bmal1_R       | TGAGCCTGCCCTGGTAATAG                                           | Mouse              | qPCR primer for mRNA   |
| Clock_F       | GGCCTTCTTATGAAGATAGAGTTTG                                      | Mouse              | qPCR primer for mRNA   |
| Clock_R       | AACTCTTCATTTGGTTCTTCAAC                                        | Mouse              | qPCR primer for mRNA   |
| Per1_F        | TGAAGCAAGACCGGGAGAG                                            | Mouse              | qPCR primer for mRNA   |
| Per1_R        | CACACACGCCATCACATCAA                                           | Mouse              | qPCR primer for mRNA   |
| Per2_F        | CTTCTGGTCTGGACTGCAC                                            | Mouse              | qPCR primer for mRNA   |
| Per2_R        | CAGGTCCTTGACGTGGAGA                                            | Mouse              | qPCR primer for mRNA   |
| GAPDH_F       | AATCCCATCACCATCTTCCA                                           | Human              | qPCR primer for mRNA   |
| GAPDH_R       | TGGACTCCACGACGTACTCA                                           | Human              | qPCR primer for mRNA   |
| CLOCK_F       | GGCACCACCATAATAGGGTA                                           | Human              | qPCR primer for mRNA   |
| CLOCK_R       | TGTTGCCCTTAGTCAGGAAC                                           | Human              | qPCR primer for mRNA   |
| PER2_F        | CGACGTGGCAGAATGTGTT                                            | Human              | qPCR primer for mRNA   |
| PER2_R        | GATTCAAGGGGGATCCATTT                                           | Human              | qPCR primer for mRNA   |
| miR183-5p_RT  | CAGTGCCATACGACGAATACTGCTA<br>GAGTTGCTAGCAGAGCCCTTAA<br>AGTGAA  | Human and<br>mouse | rtPCR primer for miRNA |
| miR183-5p_F   | CAGTGCCATACGACGAATACTGC                                        | Human and<br>mouse | qPCR primer for miRNA  |
| miR183-5p_R   | GCGCTATGGCACTGGTAGA                                            | Human and<br>mouse | qPCR primer for miRNA  |
| miR96-5p_RT   | TAGTGCCAAAGATATGTGAGACGTA<br>CGTTGAGTACGTCAAGTGAAGTAGC<br>AAAA | Human and<br>mouse | rtPCR primer for miRNA |

|              |                                                                |                 |                        |
|--------------|----------------------------------------------------------------|-----------------|------------------------|
| miR96-5p_F   | CGTAGTGCCAAAGATATGTGAGACG                                      | Human and mouse | qPCR primer for miRNA  |
| miR96-5p_R   | GGCCTTTGGCACTAGCACAT                                           | Human and mouse | qPCR primer for miRNA  |
| miR182-5p_RT | CATTGCCAAACAACGACCAGAGCTA<br>GAGAACCTAGCTCACCCACTAC<br>CGGTGT  | Human and mouse | rtPCR primer for miRNA |
| miR182-5p_F  | CATTGCCAAACAACGACCAGAG                                         | Human and mouse | qPCR primer for miRNA  |
| miR182-5p_R  | GCGTTTGGCAATGGTAGAACTC                                         | Human and mouse | qPCR primer for miRNA  |
| miR191-5p_RT | TCCGTTGTCAAGCTCTCGACGTACGT<br>TGAGTACGTCACTCCACGCCAGCTG        | Human and mouse | rtPCR primer for miRNA |
| miR191-5p_F  | TCCGTTGTCAAGCTCTCGACG                                          | Human and mouse | qPCR primer for miRNA  |
| miR191-5p_R  | GCTGCAACGGAATCCCAAAG                                           | Human and mouse | qPCR primer for miRNA  |
| MIR182-5p_RT | CATTGCCAAACAACGACCAGAGCTA<br>GAGAACCTAGCTCACCCACTACAGTG<br>TGA | Human           | rtPCR primer for miRNA |
| MIR182-5p_F  | CATTGCCAAACAACGACCAGAG                                         | Human           | qPCR primer for miRNA  |
| MIR182-5p_R  | GCGTTTGGCAATGGTAGAACT                                          | Human           | qPCR primer for miRNA  |
